# Supplementary material for: Tuning photocatalytic activity of g-C3N4 through Cu deposition via chemical reduction and a DBD plasma method for visible-light-driven Cr(vi) reduction
Source: Royal Society of Chemistry journal article supplement (doi:10.1039/d5ra08483k), 2026-03-31
Supplement: d5ra08483k3.pdf [file d5ra08483k3.pdf]

## Supplementary Material

Tuning photocatalytic activity of g-C<sub>3</sub>N<sub>4</sub> through Cu deposition via chemical reduction and DBD plasma method for visible-light-driven Cr(VI) reduction

Jana Petrović,<sup>a</sup> Andjelika Bjelajac,<sup>b</sup> Tihana Mudrinić,<sup>c</sup> Jérôme Guillot,<sup>b</sup> Simon Bulou\*<sup>b</sup> and Rada Petrović<sup>d</sup>

<sup>a</sup>Innovation Center of the Faculty of Technology and Metallurgy, Ltd, Belgrade, Serbia

<sup>b</sup>Luxembourg Institute of Science and Technology, Advanced Plasma and Vapor Deposition Processes Engineering, L-4362 Esch-sur-Alzette, Luxembourg

<sup>c</sup>University of Belgrade – Institute of Chemistry, Technology and Metallurgy – National Institute of the Republic of Serbia, Belgrade, Serbia

<sup>d</sup>University of Belgrade, Faculty of Technology and Metallurgy, Belgrade, Serbia

## Raman spectroscopy

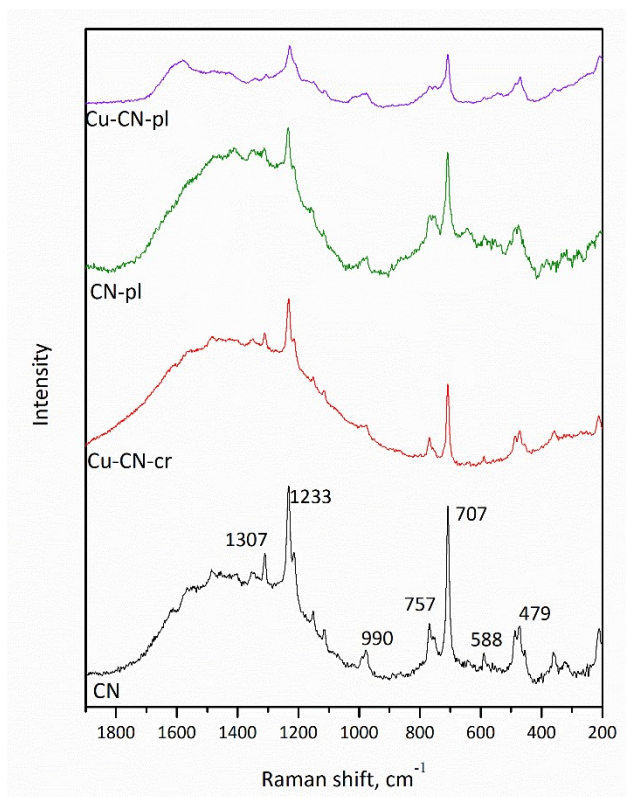

Fig. S1 Raman spectra of the CNs

## EPR analysis

Table S1. Peak intensity (a. u) per 1 mg of the CN-based samples

| Sample            | CN                | Cu-CN-cr          | CN-pl             | Cu-CN-pl |
|-------------------|-------------------|-------------------|-------------------|----------|
| Intensity - dark  | $3.30 \cdot 10^5$ | $1.55 \cdot 10^5$ | $4.43 \cdot 10^5$ | -        |
| Intensity - light | $5.07 \cdot 10^5$ | $2.19 \cdot 10^5$ | $5.66 \cdot 10^5$ | -        |

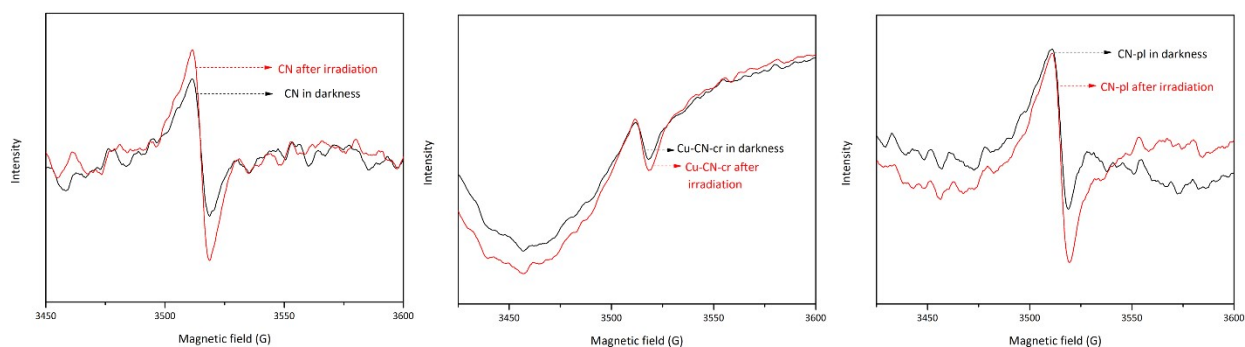

Fig. S2 EPR spectra of the CNs

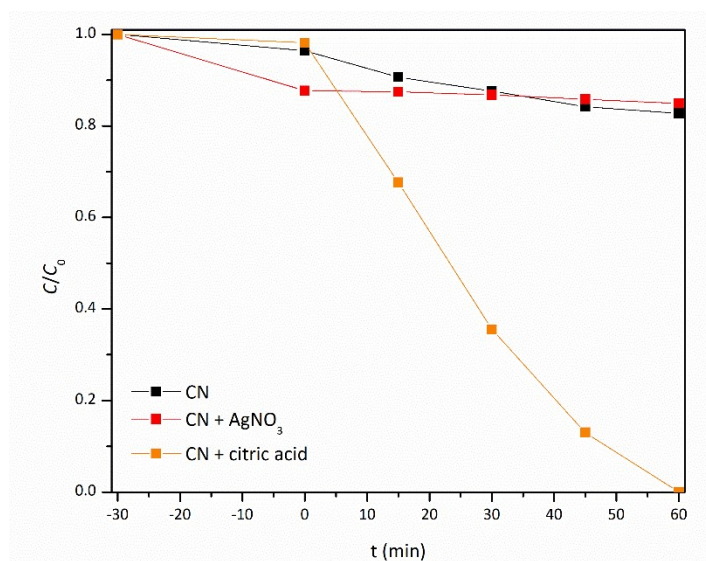

### Effects of scavengers and kinetic

Fig. S3 Photocatalytic reduction of Cr(VI) under the visible irradiation with the CN

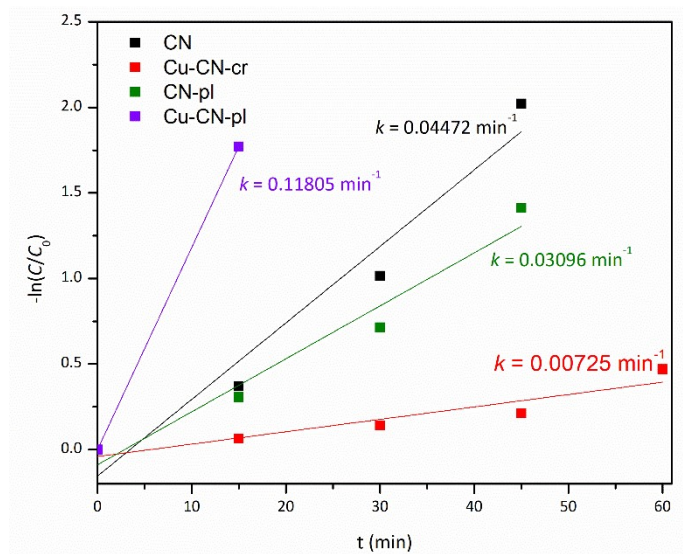

Fig. S4 Pseudo-first order kinetics plots

The photocatalytic reduction of Cr(VI) follows the pseudo-first-order equation<sup>1</sup>:

$$-\ln \frac{C}{C_0} = kt$$

Where  $C$  is the concentration of the solution at reaction time  $t$ ,  $C_0$  is the concentration of solution before the irradiation and  $k$  is rate constant.

## Cyclic voltammetry (CV)

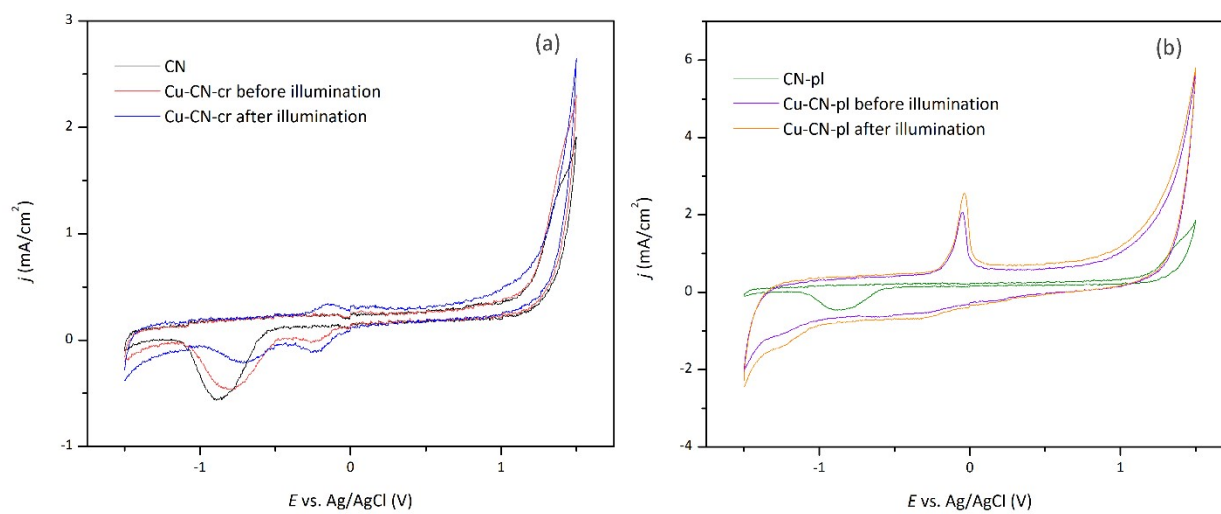

Fig. S5 CV curves of CN samples

## Reference:

1 S. Liu, W. Zhang, P. Zhu, S. Zuo and H. Xia, *J. Environ. Chem. Eng.*, 2021, **9**, 105879.
